# Supplementary material for: Characterization of leaf apoplastic peroxidases and metabolites in Vigna unguiculata in response to toxic manganese supply and silicon
Source: PubMed Central journal article supplement — J Exp Bot. 2009 Mar 13;60(6):1663–78. doi: 10.1093/jxb/erp034 (PMC2671618; doi:10.1093/jxb/erp034), 2009-03-13
Supplement: erp034_1.pdf [file erp034_1.pdf]

# Characterization of leaf apoplastic peroxidases and metabolites in *Vigna unguiculata* in response to toxic manganese supply and silicon

Hendrik Führs, Stefanie Götze, André Specht, Alexander Erban, Sébastien Gallien, Dimitri Heintz, Alain Van Dorsselaer, Joachim Kopka, Hans-Peter Braun & Walter J. Horst

## Supplementary data

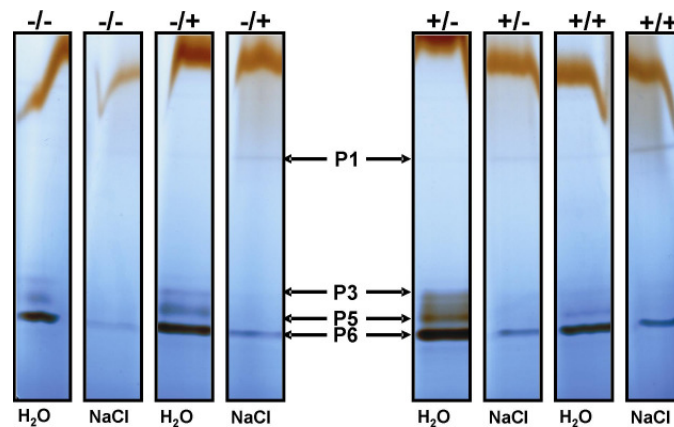

Fig. S1: Resolution of dH<sub>2</sub>O- and NaCl-extractable AWF proteins after 0 and 4 d of Mn treatment of  $\pm$ Si treated plants (as described in “Materials and Methods”) of the Mn-sensitive cultivar TVu 91 after separation with BN-PAGE stained for guaiacol-peroxidase. The signs on the top of the lanes are as follows: -/- 0.2  $\mu$ M Mn/0  $\mu$ M Si, -/+ 0.2  $\mu$ M Mn /20  $\mu$ M Si, +/- 50  $\mu$ M Mn/0  $\mu$ M Si, +/+ 50  $\mu$ M Mn/20  $\mu$ M Si. H<sub>2</sub>O and NaCl as indicated under the lanes describe the infiltration solution to extract AWF. 16  $\mu$ g of concentrated AWF (as determined with 2D Quant Kit) were loaded onto each lane. Guaiacol-POD staining was done in 18 mM guaiacol (in 9 mM Na<sub>2</sub>HPO<sub>4</sub>) and 0.03% H<sub>2</sub>O<sub>2</sub> at pH 6.0.

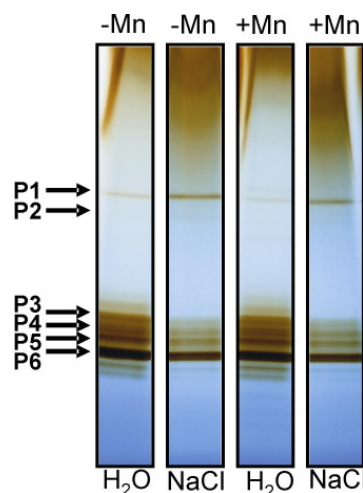

Fig. S2: Resolution of dH<sub>2</sub>O- and NaCl-extractable AWF proteins after 0 and 4 d of Mn of the Mn-sensitive cultivar TVu 91 after separation with BN-PAGE stained for guaiacol-peroxidase. -Mn indicates 0.2  $\mu$ M Mn treatment, whereas +Mn describes 50  $\mu$ M Mn treatment for four days. H<sub>2</sub>O and NaCl as indicated under the lanes describe the infiltration solution to extract AWF. 180  $\mu$ g of concentrated AWF (as determined with 2D Quant Kit) were loaded onto each lane. Guaiacol-POD staining was done in 18 mM guaiacol (in 9 mM Na<sub>2</sub>HPO<sub>4</sub>) and 0.03% H<sub>2</sub>O<sub>2</sub> at pH 6.0.

Table S1: Determined extinction coefficients for the calculation of NADH-*peroxidase* activities of different POD isoenzymes supplied with different phenols in changing concentrations as shown in Fig. 4, 6 and 7.

| Phenol <sup>a</sup>                     | Absorption | Phenol conc. [mM] <sup>b</sup> | NADH conc. [mM] <sup>c</sup> | Total conc. [mM] <sup>d</sup> | Extinction coefficient [ε] <sup>e</sup> |
|-----------------------------------------|------------|--------------------------------|------------------------------|-------------------------------|-----------------------------------------|
| <i>p</i> -coumaric acid                 | 1.979      | 1.66                           | 0.22                         | 1.88                          | 1.13                                    |
| vanillic acid                           | 1.051      | 1.66                           | 0.22                         | 1.88                          | 0.60                                    |
| gallic acid                             | 1.034      | 1.66                           | 0.22                         | 1.88                          | 0.59                                    |
| benzoic acid                            | 1.026      | 1.66                           | 0.22                         | 1.88                          | 0.58                                    |
| ferulic acid                            | 3.429      | 1.66                           | 0.22                         | 1.88                          | 1.95                                    |
| syringic acid                           | 1.033      | 1.66                           | 0.22                         | 1.88                          | 0.59                                    |
| protocatechuic acid                     | 1.025      | 1.66                           | 0.22                         | 1.88                          | 0.58                                    |
| caffeic acid                            | 3.453      | 1.66                           | 0.22                         | 1.88                          | 1.97                                    |
| chlorogenic acid                        | 3.69       | 1.66                           | 0.22                         | 1.88                          | 2.10                                    |
| <i>p</i> -hydroxybenzoic acid           | 0.800      | 1.66                           | 0.22                         | 1.88                          | 0.46                                    |
| <i>p</i> -coumaric acid                 | 1.137      | 0.166                          | 0.22                         | 0.386                         | 3.15                                    |
| vanillic acid                           | 1.046      | 0.166                          | 0.22                         | 0.386                         | 2.90                                    |
| gallic acid                             | 1.052      | 0.166                          | 0.22                         | 0.386                         | 2.92                                    |
| benzoic acid                            | 1.03       | 0.166                          | 0.22                         | 0.386                         | 2.86                                    |
| ferulic acid                            | 1.484      | 0.166                          | 0.22                         | 0.386                         | 4.12                                    |
| syringic acid                           | 1.045      | 0.166                          | 0.22                         | 0.386                         | 2.90                                    |
| protocatechuic acid                     | 1.038      | 0.166                          | 0.22                         | 0.386                         | 2.88                                    |
| caffeic acid                            | 1.52       | 0.166                          | 0.22                         | 0.386                         | 4.22                                    |
| chlorogenic acid                        | 2.715      | 0.166                          | 0.22                         | 0.386                         | 7.53                                    |
| <i>p</i> -hydroxybenzoic acid           | 0.800      | 0.166                          | 0.22                         | 0.386                         | 2.21                                    |
| <i>p</i> -coumaric acid                 | 1.053      | 0.0166                         | 0.22                         | 0.2366                        | 4.77                                    |
| vanillic acid                           | 1.034      | 0.0166                         | 0.22                         | 0.2366                        | 4.70                                    |
| gallic acid                             | 1.039      | 0.0166                         | 0.22                         | 0.2366                        | 4.70                                    |
| benzoic acid                            | 1.04       | 0.0166                         | 0.22                         | 0.2366                        | 4.71                                    |
| ferulic acid                            | 1.08       | 0.0166                         | 0.22                         | 0.2366                        | 4.89                                    |
| syringic acid                           | 1.036      | 0.0166                         | 0.22                         | 0.2366                        | 4.69                                    |
| protocatechuic acid                     | 1.032      | 0.0166                         | 0.22                         | 0.2366                        | 4.67                                    |
| caffeic acid                            | 1.082      | 0.0166                         | 0.22                         | 0.2366                        | 4.90                                    |
| chlorogenic acid                        | 1.195      | 0.0166                         | 0.22                         | 0.2366                        | 5.41                                    |
| <i>p</i> -hydroxybenzoic acid           | 0.800      | 0.0166                         | 0.22                         | 0.2366                        | 3.62                                    |
| <i>p</i> -coumaric acid                 | 1.016      | 0.00166                        | 0.22                         | 0.22166                       | 4.91                                    |
| vanillic acid                           | 1.017      | 0.00166                        | 0.22                         | 0.22166                       | 4.91                                    |
| gallic acid                             | 1.021      | 0.00166                        | 0.22                         | 0.22166                       | 4.93                                    |
| benzoic acid                            | 1.02       | 0.00166                        | 0.22                         | 0.22166                       | 4.93                                    |
| ferulic acid                            | 1.018      | 0.00166                        | 0.22                         | 0.22166                       | 4.92                                    |
| syringic acid                           | 1.008      | 0.00166                        | 0.22                         | 0.22166                       | 4.87                                    |
| protocatechuic acid                     | 1.017      | 0.00166                        | 0.22                         | 0.22166                       | 4.91                                    |
| caffeic acid                            | 0.981      | 0.00166                        | 0.22                         | 0.22166                       | 4.74                                    |
| chlorogenic acid                        | 1.029      | 0.00166                        | 0.22                         | 0.22166                       | 4.97                                    |
| <i>p</i> -hydroxybenzoic acid           | 0.800      | 0.00166                        | 0.22                         | 0.22166                       | 3.86                                    |
| Phenol combination <sup>f</sup>         | Absorption | Phenol conc. [mM] <sup>b</sup> | NADH conc. [mM] <sup>c</sup> | Total conc. [mM] <sup>d</sup> | Extinction coefficient [ε] <sup>e</sup> |
| <i>p</i> -coumaric acid [0.166mM] with: |            |                                |                              |                               |                                         |
| vanillic acid                           | 1.079      | 0.0166                         | 0.22                         | 0.4026                        | 2.87                                    |
| gallic acid                             | 1.078      | 0.0166                         | 0.22                         | 0.4026                        | 2.87                                    |
| benzoic acid                            | 1.078      | 0.0166                         | 0.22                         | 0.4026                        | 2.87                                    |
| ferulic acid                            | 1.118      | 0.0166                         | 0.22                         | 0.4026                        | 2.97                                    |
| syringic acid                           | 1.072      | 0.0166                         | 0.22                         | 0.4026                        | 2.85                                    |
| protocatechuic acid                     | 1.075      | 0.0166                         | 0.22                         | 0.4026                        | 2.86                                    |
| caffeic acid                            | 1.120      | 0.0166                         | 0.22                         | 0.4026                        | 2.98                                    |
| chlorogenic acid                        | 1.223      | 0.0166                         | 0.22                         | 0.4026                        | 3.25                                    |
| <i>p</i> -hydroxybenzoic acid           |            | 0.0166                         | 0.22                         | 0.4026                        |                                         |
| - <sup>g</sup>                          | 0.971      | -                              | 0.22                         | 0.22                          | 4.73                                    |

<sup>a</sup> Phenol added to the measuring solution. Values correspond to Figs. 4, 6 and 7.

<sup>b</sup> Phenol concentration in the measuring solution. Values correspond to Fig. 4, 6, and 7.

<sup>c</sup> NADH concentration added to the measuring solution. Values correspond to Fig.4, 6, and 7.

<sup>d</sup> Calculated total concentration of the absorbing substances phenol and NADH based on <sup>b</sup> and <sup>c</sup>.

<sup>e</sup> Calculated extinction coefficient  $\epsilon$  [ $\text{L} (\text{mmol}\cdot\text{cm})^{-1}$  or  $\text{cm}^2 (\mu\text{mol})^{-1}$ ] according to the Beer-Lambert law:  $\text{Abs.}=\epsilon\cdot c\cdot d$

<sup>f</sup> 0.0166 mM of each phenol was added to 0.166 mM *p*-coumaric acid, so that the end concentration of absorbing substances was 0.4026. These values correspond to Fig. 7.

<sup>g</sup> Extinction coefficient  $\epsilon$  calculated without phenol supply to the measuring solution

Tab.S2: Peptide sequences of apoplastic cowpea proteins. AWF proteins were separated by means of BN-PAGE and afterwards stained for guaiacol-peroxidase activity. Stained BN-bands were cut from the gel and sequenced with ESI-MS/MS. Results presented here are derived from 2 independent sequencing runs.

| bande <sup>a</sup>                      | Protein name <sup>b</sup>                                                   | Protein accession numbers <sup>c</sup> | Protein molecular weight (Da) <sup>d</sup> | Number of unique peptides | Percentage sequence coverage <sup>e</sup> | Peptide sequence      | Mascot Ion score | Mascot Identity score | difference score | Number of identified +1H spectra | Number of identified +2H spectra | Number of identified +3H spectra | Number of identified +4H spectra | Number of enzymatic termini | Calculated +1H Peptide Mass (AMU) |
|-----------------------------------------|-----------------------------------------------------------------------------|----------------------------------------|--------------------------------------------|---------------------------|-------------------------------------------|-----------------------|------------------|-----------------------|------------------|----------------------------------|----------------------------------|----------------------------------|----------------------------------|-----------------------------|-----------------------------------|
| AWF <sub>H2O</sub> _P1                  | fasciclin-like arabinogalactan protein 12 [Gossypium hirsutum]              | ABV27483.1                             | 43 894.2                                   | 1                         | 1.88%                                     | LADEINTR              | 61               | 47                    | 14               | 0                                | 1                                | 0                                | 0                                | 2                           | 931.4849                          |
|                                         | Fructose-1,6-bisphosphatase, chloroplast precursor [Glycine max]            | Q42796.1                               | 43 879.4                                   | 2                         | 7.96%                                     | ANISNLTVGVQGANVQGEDQK | 51.5             | 44.8                  | 6.7              | 0                                | 0                                | 1                                | 0                                | 2                           | 2 142,0792                        |
|                                         | Fructose-1,6-bisphosphatase, chloroplast precursor [Glycine max]            | Q42796.1                               | 43 879.4                                   | 2                         | 7.96%                                     | YIGSLVGFDFHR          | 37.8             | 46.5                  | -8.7             | 0                                | 0                                | 1                                | 0                                | 2                           | 1 263.6486                        |
|                                         | fasciclin-like arabinogalactan protein FLA8 [Arabidopsis thaliana]          | AAG24276.1                             | 43 044.2                                   | 1                         | 2.62%                                     | VGFSAASGSK            | 67.5             | 46.1                  | 21.4             | 0                                | 1                                | 0                                | 0                                | 2                           | 967.4848                          |
|                                         | xyloglucan endotransglucosylase/hydrolase 2 [Cucumis melo]                  | AB194062.1                             | 36 316.1                                   | 1                         | 3.88%                                     | TDWSQAPFTASYR         | 90.7             | 45.8                  | 44.9             | 0                                | 1                                | 0                                | 0                                | 2                           | 1 529.7025                        |
|                                         | CYP1 (putative cyclophilin_ABH_like) [Vigna radiata]                        | BAB82452.1                             | 18 188.7                                   | 1                         | 6.98%                                     | IVFELFADTTTPR         | 90               | 46                    | 44               | 0                                | 1                                | 0                                | 0                                | 2                           | 1 408.7479                        |
|                                         | basic chitinase, chitinase [Arabidopsis thaliana]                           | NP_566426.1                            | 36 196.3                                   | 1                         | 5.67%                                     | LPGYGVITNIHNGGLECGR   | 128              | 44.9                  | 83.1             | 0                                | 1                                | 1                                | 0                                | 2                           | 2 003.0385                        |
|                                         | Os01g0357100 [Oryza sativa (japonica cultivar-group)]                       | NP_001043008.1                         | 72 385.0                                   | 1                         | 1.65%                                     | LADEYGSSELR           | 72.3             | 49.1                  | 23.2             | 0                                | 1                                | 0                                | 0                                | 2                           | 1 209.5752                        |
|                                         | cytosolic malate dehydrogenase [Cicer arietinum]                            | CAC10208.1                             | 41 361.4                                   | 1                         | 2.11%                                     | ALGQISER              | 61.4             | 47.2                  | 14.2             | 0                                | 1                                | 0                                | 0                                | 2                           | 873.4795                          |
|                                         | cyclophilin [Phaseolus vulgaris]                                            | CAA52414.1                             | 18 141.5                                   | 1                         | 8.14%                                     | VFFDMTIGGQPAGR        | 75.8             | 45.7                  | 30.1             | 0                                | 2                                | 0                                | 0                                | 2                           | 1 511.7319                        |
|                                         | alpha galactosidase [Glycine max]                                           | AAA73963.1                             | 46 378.6                                   | 4                         | 10.40%                                    | SVGNSWR               | 38.1             | 48.6                  | -10.5            | 0                                | 1                                | 0                                | 0                                | 2                           | 805.3956                          |
|                                         | alpha galactosidase [Glycine max]                                           | AAA73963.1                             | 46 378.6                                   | 4                         | 10.40%                                    | TFASWGIDYLK           | 64.8             | 46.5                  | 18.3             | 0                                | 2                                | 0                                | 0                                | 2                           | 1 300.6578                        |
|                                         | alpha galactosidase [Glycine max]                                           | AAA73963.1                             | 46 378.6                                   | 4                         | 10.40%                                    | TMPGSLGHEEQDAK        | 36.8             | 46.1                  | -9.3             | 0                                | 1                                | 0                                | 0                                | 2                           | 1 499.6801                        |
|                                         | alpha galactosidase [Glycine max]                                           | AAA73963.1                             | 46 378.6                                   | 4                         | 10.40%                                    | YDNCENNNISPK          | 67.5             | 47.4                  | 20.1             | 0                                | 2                                | 0                                | 0                                | 2                           | 1 467.6175                        |
|                                         | endochitinase precursor [Humulus lupulus]                                   | AAD34596.1                             | 33 511.4                                   | 1                         | 4.11%                                     | GFYTYDAFLTAAR         | 75.7             | 46                    | 29.7             | 0                                | 1                                | 0                                | 0                                | 2                           | 1 495.7221                        |
|                                         | unnamed protein product (putative secretory peroxidase) [Vitis vinifera]    | CAO48839.1                             | 34 372.5                                   | 1                         | 2.79%                                     | GVEVVDTIK             | 53.1             | 46.5                  | 6.6              | 0                                | 1                                | 0                                | 0                                | 2                           | 1 023.5363                        |
|                                         | unnamed protein product (putative Serine carboxypeptidase) [Vitis vinifera] | CAO68876.1                             | 57 192.0                                   | 1                         | 2.96%                                     | NLEVGIPDLLEDGIK       | 58.1             | 45.3                  | 12.8             | 0                                | 2                                | 0                                | 0                                | 2                           | 1 624.8801                        |
| AWF <sub>H2O</sub> _P3                  | fasciclin-like arabinogalactan protein 12 [Gossypium hirsutum]              | ABV27483.1                             | 43 894.2                                   | 1                         | 1.88%                                     | LADEINTR              | 73.1             | 47                    | 26.1             | 0                                | 1                                | 0                                | 0                                | 2                           | 931.4849                          |
|                                         | pepti (ISS) (putative Cyclophilin) [Ostreococcus tauri]                     | CAL57205.1                             | 38 854.4                                   | 1                         | 3.27%                                     | IVLGLFGDDAPR          | 60.6             | 46.3                  | 14.3             | 0                                | 2                                | 0                                | 0                                | 2                           | 1 272.6955                        |
|                                         | unnamed protein product (putative Thaumatin family) [Vitis vinifera]        | CAO62993.1                             | 26 139.4                                   | 1                         | 4.07%                                     | GSDGSVIGCK            | 77.4             | 46.7                  | 30.7             | 0                                | 1                                | 0                                | 0                                | 2                           | 979.452                           |
|                                         | CYP1 (putative cyclophilin_ABH_like) [Vigna radiata]                        | BAB82452.1                             | 18 188.7                                   | 1                         | 6.98%                                     | IVFELFADTTTPR         | 71.7             | 46                    | 25.7             | 0                                | 1                                | 0                                | 0                                | 2                           | 1 408.7479                        |
|                                         | putative glycine-rich RNA-binding protein [Dianthus caryophyllus]           | BAF34340.1                             | 16 872.1                                   | 1                         | 5.68%                                     | SITVNEAQR             | 65.3             | 46.4                  | 18.9             | 0                                | 1                                | 0                                | 0                                | 2                           | 1 104.5649                        |
|                                         | peroxidase [Spinacia oleracea]                                              | CAA71493.1                             | 33 435.5                                   | 2                         | 7.12%                                     | MGASILR               | 42.9             | 47.7                  | -4.8             | 0                                | 1                                | 0                                | 0                                | 2                           | 763.4137                          |
| peroxidase [Spinacia oleracea]          | CAA71493.1                                                                  | 33 435.5                               | 2                                          | 7.12%                     | MGNISPLTGSSGEIR                           | 79.7                  | 45.8             | 33.9                  | 0                | 1                                | 0                                | 0                                | 2                                | 1 534.7536                  |                                   |
| AWF <sub>H2O</sub> _P4                  | fasciclin-like arabinogalactan protein 12 [Gossypium hirsutum]              | ABV27483.1                             | 43 894.2                                   | 1                         | 1.88%                                     | LADEINTR              | 69.5             | 47                    | 22.5             | 0                                | 2                                | 0                                | 0                                | 2                           | 931.4849                          |
|                                         | pepti (ISS) (putative Cyclophilin) [Ostreococcus tauri]                     | CAL57205.1                             | 38 854.4                                   | 1                         | 3.27%                                     | IVLGLFGDDAPR          | 56.1             | 46.3                  | 9.8              | 0                                | 2                                | 0                                | 0                                | 2                           | 1 272.6955                        |
|                                         | oxidoreductase family protein [Arabidopsis thaliana]                        | NP_188715.2                            | 38 560.4                                   | 1                         | 3.94%                                     | DVAVLEAMLESQAK        | 96.1             | 46.1                  | 50               | 0                                | 1                                | 0                                | 0                                | 2                           | 1 448.7308                        |
|                                         | CYP1 (putative cyclophilin_ABH_like) [Vigna radiata]                        | BAB82452.1                             | 18 188.7                                   | 1                         | 6.98%                                     | IVFELFADTTTPR         | 76.5             | 46                    | 30.5             | 0                                | 1                                | 0                                | 0                                | 2                           | 1 408.7479                        |
|                                         | hypothetical protein (putative 14-3-3 protein) [Vitis vinifera]             | CAN81774.1                             | 29 523.7                                   | 1                         | 4.58%                                     | TVEVELTVEER           | 86               | 46.5                  | 39.5             | 0                                | 1                                | 0                                | 0                                | 2                           | 1 432.7172                        |
|                                         | peroxidase [Spinacia oleracea]                                              | CAA71493.1                             | 33 435.5                                   | 2                         | 7.12%                                     | MGASILR               | 46.2             | 47.7                  | -1.5             | 0                                | 1                                | 0                                | 0                                | 2                           | 763.4137                          |
| peroxidase [Spinacia oleracea]          | CAA71493.1                                                                  | 33 435.5                               | 2                                          | 7.12%                     | MGNISPLTGSSGEIR                           | 87.1                  | 45.8             | 41.3                  | 0                | 3                                | 0                                | 0                                | 2                                | 1 534.7536                  |                                   |
| AWF <sub>H2O</sub> _P5                  | fasciclin-like arabinogalactan protein 12 [Gossypium hirsutum]              | ABV27483.1                             | 43 894.2                                   | 1                         | 1.88%                                     | LADEINTR              | 54.4             | 47                    | 7.4              | 0                                | 2                                | 0                                | 0                                | 2                           | 931.4849                          |
|                                         | unnamed protein product (putative Thaumatin family) [Vitis vinifera]        | CAO62993.1                             | 26 139.4                                   | 1                         | 4.07%                                     | GSDGSVIGCK            | 80.8             | 46.7                  | 34.1             | 0                                | 2                                | 0                                | 0                                | 2                           | 979.452                           |
|                                         | CYP1 (putative cyclophilin_ABH_like) [Vigna radiata]                        | BAB82452.1                             | 18 188.7                                   | 1                         | 6.98%                                     | IVFELFADTTTPR         | 73               | 46                    | 27               | 0                                | 1                                | 0                                | 0                                | 2                           | 1 408.7479                        |
|                                         | Protein P21 (putative Thaumatin family) [Glycine max]                       | P25096.1                               | 25 930.1                                   | 1                         | 4.18%                                     | TGCNFDGSGR            | 81.4             | 46                    | 35.4             | 0                                | 2                                | 0                                | 0                                | 2                           | 1 070.4326                        |
|                                         | peroxidase [Spinacia oleracea]                                              | CAA71493.1                             | 33 435.5                                   | 2                         | 7.12%                                     | MGASILR               | 45.5             | 47.7                  | -2.2             | 0                                | 1                                | 0                                | 0                                | 2                           | 763.4137                          |
|                                         | peroxidase [Spinacia oleracea]                                              | CAA71493.1                             | 33 435.5                                   | 2                         | 7.12%                                     | MGNISPLTGSSGEIR       | 83.1             | 45.8                  | 37.3             | 0                                | 4                                | 0                                | 0                                | 2                           | 1 534.7536                        |
| transaldolase [Lycopersicon esculentum] | AAG16981.1                                                                  | 55 421.0                               | 1                                          | 2.13%                     | VTVSASFVSR                                | 59                    | 46.2             | 12.8                  | 0                | 1                                | 0                                | 0                                | 2                                | 1 199.6423                  |                                   |
| AWF <sub>H2O</sub> _P6                  | CYP1 (putative cyclophilin_ABH_like) [Vigna radiata]                        | BAB82452.1                             | 18 188.7                                   | 1                         | 6.98%                                     | IVFELFADTTTPR         | 72.9             | 46                    | 26.9             | 0                                | 1                                | 0                                | 0                                | 2                           | 1 408.7479                        |
|                                         | iron-superoxide dismutase precursor [Vigna unguiculata]                     | AAF28773.1                             | 27 393.8                                   | 1                         | 6.53%                                     | ASLGLQNVAGINLLFK      | 83               | 45.4                  | 37.6             | 0                                | 1                                | 0                                | 0                                | 2                           | 1 699.9747                        |
|                                         | peroxidase [Spinacia oleracea]                                              | CAA71493.1                             | 33 435.5                                   | 2                         | 7.12%                                     | MGASILR               | 51.8             | 47.7                  | 4.1              | 0                                | 2                                | 0                                | 0                                | 2                           | 763.4137                          |
|                                         | peroxidase [Spinacia oleracea]                                              | CAA71493.1                             | 33 435.5                                   | 2                         | 7.12%                                     | MGNISPLTGSSGEIR       | 105              | 45.8                  | 59.2             | 0                                | 4                                | 1                                | 0                                | 2                           | 1 534.7536                        |
|                                         | ATAM11, amidase [Arabidopsis thaliana]                                      | NP_563831.1                            | 45 038.6                                   | 1                         | 3.53%                                     | LVDFSIGDTGGSVR        | 91.2             | 45.8                  | 45.4             | 0                                | 1                                | 0                                | 0                                | 2                           | 1 523.7707                        |
|                                         |                                                                             |                                        |                                            |                           |                                           |                       |                  |                       |                  |                                  |                                  |                                  |                                  |                             |                                   |
|                                         | peroxidase [Populus alba x Populus tremula var. glandulosa]                 | AAX53172.1                             | 33 367.4                                   | 2                         | 7.59%                                     | GFEVIDTIK             | 59.6             | 47.7                  | 11.9             | 0                                | 1                                | 0                                | 0                                | 2                           | 1 021.5571                        |

|                                                                |                                                                                                |                                                                                  |             |          |        |                         |                     |      |       |       |   |    |   |   |            |            |
|----------------------------------------------------------------|------------------------------------------------------------------------------------------------|----------------------------------------------------------------------------------|-------------|----------|--------|-------------------------|---------------------|------|-------|-------|---|----|---|---|------------|------------|
| AWF <sub>NaCl</sub> _P1                                        | peroxidase [Populus alba x Populus tremula var. glandulosa]                                    | AAX53172.1                                                                       | 33 367.4    | 2        | 7.59%  | GFEVIDTIK               | 59.6                | 47.7 | 11.9  | 0     | 1 | 0  | 0 | 2 | 1 021,5571 |            |
|                                                                | peroxidase [Populus alba x Populus tremula var. glandulosa]                                    | AAX53172.1                                                                       | 33 367.4    | 2        | 7.59%  | MGNISPLTGTNGEIR         | 57.3                | 45.8 | 11.5  | 0     | 1 | 0  | 0 | 2 | 1 559,7854 |            |
|                                                                | peroxidase [Sesamum indicum]                                                                   | ABB89209.1                                                                       | 35 838.4    | 2        | 6.97%  | IAIDMDPTTPR             | 73.6                | 47.7 | 25.9  | 0     | 1 | 0  | 0 | 2 | 1 245,6152 |            |
|                                                                | peroxidase [Sesamum indicum]                                                                   | ABB89209.1                                                                       | 35 838.4    | 2        | 6.97%  | VSCADILALATR            | 89.5                | 47.1 | 42.4  | 0     | 2 | 0  | 0 | 2 | 1 289,6889 |            |
|                                                                | pectinacetyltransferase precursor [Vigna radiata var. radiata]                                 | CAA67728.1                                                                       | 43 804.9    | 2        | 8.77%  | VFAAVVDDLLAK            | 50.7                | 46.6 | 4.1   | 0     | 1 | 0  | 0 | 2 | 1 260,7204 |            |
|                                                                | pectinacetyltransferase precursor [Vigna radiata var. radiata]                                 | CAA67728.1                                                                       | 43 804.9    | 2        | 8.77%  | YCDGSSFTGDVEAVDPATNLHFR | 78.7                | 44   | 34.7  | 0     | 0 | 1  | 0 | 2 | 2 558,1258 |            |
|                                                                | Peroxidase 45 precursor [Arabidopsis thaliana]                                                 | Q96522.1                                                                         | 35 811.1    | 1        | 8.00%  | GLFTSDQILFTDQR          | 86.6                | 45.3 | 41.3  | 0     | 2 | 0  | 0 | 2 | 1 640,8287 |            |
|                                                                | Peroxidase 45 precursor [Arabidopsis thaliana]                                                 | Q96522.1                                                                         | 35 811.1    | 1        | 8.00%  | VSCADILALATR            | 89.5                | 47.1 | 42.4  | 0     | 2 | 0  | 0 | 2 | 1 289,6889 |            |
|                                                                | acid alpha galactosidase 1 [Cucumis sativus]                                                   | ABC55266.1                                                                       | 45 680.3    | 1        | 1.94%  | VAVVLLNR                | 56.2                | 45.6 | 10.6  | 0     | 1 | 0  | 0 | 2 | 883,5728   |            |
|                                                                | pectin acetyltransferase [Eucalyptus globulus subsp. globulus]                                 | ABG34280.1                                                                       | 38 829.9    | 2        | 6.29%  | AEENPDDFNWNR            | 81.6                | 45.8 | 35.8  | 0     | 1 | 0  | 0 | 2 | 1 538,6663 |            |
|                                                                | pectin acetyltransferase [Eucalyptus globulus subsp. globulus]                                 | ABG34280.1                                                                       | 38 829.9    | 2        | 6.29%  | AIDCPYPCDK              | 53.5                | 48.9 | 4.6   | 0     | 1 | 0  | 0 | 2 | 1 238,5189 |            |
|                                                                | Fructose-bisphosphate aldolase, chloroplast precursor [Oryza sativa (japonica cultivar-group)] | ABA91632.2                                                                       | 42 913.5    | 1        | 3.26%  | LASIGLENTEANR           | 88.3                | 46   | 42.3  | 0     | 1 | 0  | 0 | 2 | 1 387,7181 |            |
|                                                                | CYP1 (putative cyclophilin_ABH_like) [Vigna radiata]                                           | BAB82452.1                                                                       | 18 188.7    | 2        | 15.10% | IVFELFADTTTPR           | 90.4                | 46   | 44.4  | 0     | 1 | 0  | 0 | 2 | 1 408,7479 |            |
|                                                                | CYP1 (putative cyclophilin_ABH_like) [Vigna radiata]                                           | BAB82452.1                                                                       | 18 188.7    | 2        | 15.10% | TSRPVIAIDCGQLS          | 40.7                | 46.1 | -5.4  | 0     | 1 | 0  | 0 | 2 | 1 474,7326 |            |
|                                                                | peroxidase2 [Medicago sativa]                                                                  | CAC38106.1                                                                       | 35 992.3    | 2        | 9.12%  | FDGLVSR                 | 50                  | 47.7 | 2.3   | 0     | 2 | 0  | 0 | 2 | 793,4209   |            |
|                                                                | peroxidase2 [Medicago sativa]                                                                  | CAC38106.1                                                                       | 35 992.3    | 2        | 9.12%  | IAINMDPTTPR             | 89.1                | 46.5 | 42.6  | 0     | 3 | 0  | 0 | 2 | 1 244,6311 |            |
|                                                                | peroxidase2 [Medicago sativa]                                                                  | CAC38106.1                                                                       | 35 992.3    | 2        | 9.12%  | VSCADILALATR            | 89.5                | 47.1 | 42.4  | 0     | 2 | 0  | 0 | 2 | 1 289,6889 |            |
|                                                                | Polygalacturonase inhibitor 2 precursor [Phaseolus vulgaris]                                   | P58822.1                                                                         | 37 086.3    | 1        | 4.09%  | ISGAIPDSYGSFSK          | 62                  | 45.8 | 16.2  | 0     | 1 | 0  | 0 | 2 | 1 428,7010 |            |
|                                                                | basic chitinase, chitinase [Arabidopsis thaliana]                                              | NP_566426.1                                                                      | 36 196.3    | 2        | 7.46%  | IGFYQR                  | 31.7                | 45.3 | -13.6 | 0     | 1 | 0  | 0 | 2 | 783,4154   |            |
|                                                                | basic chitinase, chitinase [Arabidopsis thaliana]                                              | NP_566426.1                                                                      | 36 196.3    | 2        | 7.46%  | LPGYGVITNINNGGLECGR     | 103                 | 44.9 | 58.1  | 0     | 1 | 1  | 0 | 2 | 2 003,0385 |            |
|                                                                | cyclophilin [Phaseolus vulgaris]                                                               | CAA52414.1                                                                       | 18 141.5    | 1        | 8.14%  | VFFDMTIGGQPAGR          | 79.8                | 45.7 | 34.1  | 0     | 2 | 0  | 0 | 2 | 1 511,7319 |            |
|                                                                | endochitinase precursor [Humulus lupulus]                                                      | AAD34596.1                                                                       | 33 511.4    | 1        | 6.01%  | GFYTYDAFLTAAR           | 71.5                | 46   | 25.5  | 0     | 1 | 0  | 0 | 2 | 1 495,7221 |            |
|                                                                | unnamed protein product [Populus trichocarpa]                                                  | ABK94155.1                                                                       | 77 435.5    | 1        | 1.28%  | TCAQDEVLR               | 53.5                | 46.8 | 6.7   | 0     | 1 | 0  | 0 | 2 | 1 091,5157 |            |
|                                                                | unnamed protein product (putative Serine carboxypeptidase) [Vitis vinifera]                    | CAO68876.1                                                                       | 57 192.0    | 1        | 2.96%  | NLEVGIPDLLEDGIK         | 58.1                | 45.3 | 12.8  | 0     | 2 | 0  | 0 | 2 | 1 624,8801 |            |
|                                                                | AWF <sub>NaCl</sub> _P2                                                                        | CYP1 (putative cyclophilin_ABH_like) [Vigna radiata]                             | BAB82452.1  | 18 188.7 | 2      | 6.98%                   | IVFELFADTTTPR       | 90   | 46    | 44    | 0 | 1  | 0 | 0 | 2          | 1 408,7479 |
|                                                                |                                                                                                | peroxidase [Sesamum indicum]                                                     | ABB89209.1  | 35 838.4 | 2      | 9.09%                   | DHPDNLSLAGDGFDTVIK  | 56.9 | 45.3  | 11.6  | 0 | 0  | 1 | 0 | 2          | 1 913,9248 |
|                                                                |                                                                                                | peroxidase [Sesamum indicum]                                                     | ABB89209.1  | 35 838.4 | 2      | 9.09%                   | VSCADILALATR        | 93.1 | 47.1  | 46    | 0 | 1  | 0 | 0 | 2          | 1 289,6889 |
|                                                                |                                                                                                | Probable non-specific lipid-transfer protein AKCS9 precursor [Vigna unguiculata] | Q43681.1    | 10 431.0 | 2      | 24.20%                  | KVLSNCGVTYPNC       | 31.6 | 45.7  | -14.1 | 0 | 1  | 0 | 0 | 2          | 1 511,6987 |
|                                                                |                                                                                                | Probable non-specific lipid-transfer protein AKCS9 precursor [Vigna unguiculata] | Q43681.1    | 10 431.0 | 2      | 24.20%                  | VQEPCLNYIK          | 53.9 | 47.5  | 6.4   | 0 | 1  | 0 | 0 | 2          | 1 423,6716 |
|                                                                |                                                                                                | peroxidase2 [Medicago sativa]                                                    | CAC38106.1  | 35 992.3 | 2      | 9.12%                   | FDGLVSR             | 47.7 | 47.7  | 0     | 0 | 1  | 0 | 0 | 2          | 793,4209   |
|                                                                |                                                                                                | peroxidase2 [Medicago sativa]                                                    | CAC38106.1  | 35 992.3 | 2      | 9.12%                   | IAINMDPTTPR         | 81.8 | 46.5  | 35.3  | 0 | 2  | 0 | 0 | 2          | 1 228,6362 |
|                                                                |                                                                                                | peroxidase2 [Medicago sativa]                                                    | CAC38106.1  | 35 992.3 | 2      | 9.12%                   | VSCADILALATR        | 93.1 | 47.1  | 46    | 0 | 1  | 0 | 0 | 2          | 1 289,6889 |
|                                                                |                                                                                                | unnamed protein product [Vitis vinifera]                                         | CAO17011.1  | 42 507.9 | 3      | 6.11%                   | LFSFGNLR            | 34.6 | 47.3  | -12.7 | 0 | 1  | 0 | 0 | 2          | 903,5053   |
|                                                                |                                                                                                | unnamed protein product [Vitis vinifera]                                         | CAO17011.1  | 42 507.9 | 3      | 6.11%                   | TTYVLALK            | 33.9 | 46.4  | -12.5 | 0 | 1  | 0 | 0 | 2          | 908,5457   |
|                                                                |                                                                                                | unnamed protein product [Vitis vinifera]                                         | CAO17011.1  | 42 507.9 | 3      | 6.11%                   | VINNLDER            | 62.1 | 46.7  | 15.4  | 0 | 1  | 0 | 0 | 2          | 972,5114   |
|                                                                |                                                                                                | basic chitinase, chitinase [Arabidopsis thaliana]                                | NP_566426.1 | 36 196.3 | 1      | 5.67%                   | LPGYGVITNINNGGLECGR | 114  | 44.9  | 69.1  | 0 | 1  | 0 | 0 | 2          | 2 003,0385 |
|                                                                |                                                                                                | cyclophilin [Phaseolus vulgaris]                                                 | CAA52414.1  | 18 141.5 | 1      | 8.14%                   | VFFDMTIGGQPAGR      | 71   | 45.7  | 25.3  | 0 | 1  | 1 | 0 | 2          | 1 511,7319 |
|                                                                |                                                                                                | iron-superoxide dismutase precursor [Vigna unguiculata]                          | AAF28773.1  | 27 393.8 | 2      | 8.98%                   | LVSWDVSSR           | 73.1 | 46.5  | 26.6  | 0 | 1  | 0 | 0 | 2          | 1 119,5798 |
|                                                                |                                                                                                | iron-superoxide dismutase precursor [Vigna unguiculata]                          | AAF28773.1  | 27 393.8 | 2      | 8.98%                   | SLEEIVTAYNK         | 52.9 | 46.2  | 6.7   | 0 | 1  | 0 | 0 | 2          | 1 379,7421 |
|                                                                |                                                                                                | pectinacetyltransferase precursor [Vigna radiata var. radiata]                   | CAA67728.1  | 43 804.9 | 1      | 3.01%                   | VFAAVVDDLLAK        | 54.2 | 46.6  | 7.6   | 0 | 1  | 0 | 0 | 2          | 1 260,7204 |
|                                                                |                                                                                                | endochitinase precursor [Humulus lupulus]                                        | AAD34596.1  | 33 511.4 | 1      | 4.11%                   | GFYTYDAFLTAAR       | 69.8 | 46    | 23.8  | 0 | 1  | 0 | 0 | 2          | 1 495,7221 |
|                                                                |                                                                                                | xyloglucan endotransglucosylase/hydrolase 2 [Cucumis melo]                       | ABI94062.1  | 36 316.1 | 1      | 3.88%                   | TDWSQAPFTASYR       | 79.9 | 45.8  | 34.1  | 0 | 1  | 0 | 0 | 2          | 1 529,7025 |
|                                                                |                                                                                                | Phosphoglucomutase, cytoplasmic [Pisum sativum]                                  | Q9SM60.1    | 63 106.2 | 2      | 4.12%                   | LSGTGSEGATIR        | 112  | 46.5  | 65.5  | 0 | 1  | 0 | 0 | 2          | 1 148,5913 |
|                                                                |                                                                                                | Phosphoglucomutase, cytoplasmic [Pisum sativum]                                  | Q9SM60.1    | 63 106.2 | 2      | 4.12%                   | YDENVDAGAAK         | 62.2 | 47.5  | 14.7  | 0 | 1  | 0 | 0 | 2          | 1 315,5807 |
|                                                                |                                                                                                | putative pectin methyltransferase 3 [Linum usitatissimum]                        | AAG17110.1  | 69 430.1 | 1      | 1.90%                   | DITFQNTAGPSK        | 66.1 | 46.6  | 19.5  | 0 | 1  | 0 | 0 | 2          | 1 278,6333 |
| pectin acetyltransferase [Eucalyptus globulus subsp. globulus] |                                                                                                | ABG34280.1                                                                       | 38 829.9    | 2        | 6.29%  | AEENPDDFNWNR            | 81.8                | 45.8 | 36    | 0     | 1 | 0  | 0 | 2 | 1 538,6663 |            |
| pectin acetyltransferase [Eucalyptus globulus subsp. globulus] |                                                                                                | ABG34280.1                                                                       | 38 829.9    | 2        | 6.29%  | AIDCPYPCDK              | 48.5                | 46.5 | 2     | 0     | 1 | 0  | 0 | 2 | 1 238,5189 |            |
| AWF <sub>NaCl</sub> _P3                                        |                                                                                                | Probable non-specific lipid-transfer protein AKCS9 precursor [Vigna unguiculata] | Q43681.1    | 10 431.0 | 2      | 22.20%                  | KVLSNCGVTYPNC       | 51.6 | 45.7  | 5.9   | 0 | 1  | 0 | 0 | 2          | 1 511,6987 |
|                                                                |                                                                                                | Probable non-specific lipid-transfer protein AKCS9 precursor [Vigna unguiculata] | Q43681.1    | 10 431.0 | 2      | 22.20%                  | QYVNSPGAK           | 33.6 | 47.7  | -14.1 | 0 | 1  | 0 | 0 | 2          | 963,49     |
|                                                                |                                                                                                | pepti (ISS) (putative Cyclophilin) [Ostreococcus tauri]                          | CAL57205.1  | 38 854.4 | 1      | 3.27%                   | IVLGLFGDDAPR        | 57.7 | 46.3  | 11.4  | 0 | 2  | 0 | 0 | 2          | 1 272,6955 |
|                                                                |                                                                                                | unnamed protein product (putative Thaumatin family) [Vitis vinifera]             | CAO62993.1  | 26 139.4 | 1      | 4.07%                   | GSDGSVIGCK          | 61.2 | 46.7  | 14.5  | 0 | 1  | 0 | 0 | 2          | 979,452    |
|                                                                |                                                                                                | CYP1 (putative cyclophilin_ABH_like) [Vigna radiata]                             | BAB82452.1  | 18 188.7 | 2      | 10.50%                  | IVFELFADTTTPR       | 90   | 46    | 44    | 0 | 2  | 0 | 0 | 2          | 1 408,7479 |
|                                                                |                                                                                                | CYP1 (putative cyclophilin_ABH_like) [Vigna radiata]                             | BAB82452.1  | 18 188.7 | 2      | 10.50%                  | TAENFR              | 40   | 47.9  | -7.9  | 0 | 1  | 0 | 0 | 2          | 737,3582   |
|                                                                |                                                                                                | ubiquitin/ribosomal protein 27a [Prunus avium]                                   | AAG13985.1  | 85 258.5 | 1      | 1.18%                   | TLADYNIQK           | 57.2 | 46.4  | 10.8  | 0 | 20 | 0 | 0 | 2          | 1 065,5582 |

|                                         |                                                                    |                |          |       |            |                 |      |      |       |   |   |   |   |            |            |
|-----------------------------------------|--------------------------------------------------------------------|----------------|----------|-------|------------|-----------------|------|------|-------|---|---|---|---|------------|------------|
|                                         | peroxidase2 [Medicago sativa]                                      | CAC38106.1     | 35 992.3 | 2     | 5.47%      | FDGLVSR         | 49.4 | 47.7 | 1.7   | 0 | 1 | 0 | 0 | 2          | 793.4209   |
|                                         | peroxidase2 [Medicago sativa]                                      | CAC38106.1     | 35 992.3 | 2     | 5.47%      | IAINMDPTTPR     | 81.3 | 46.5 | 34.8  | 0 | 2 | 0 | 0 | 2          | 1 244.6311 |
|                                         | aldehyde reductase [Vigna radiata]                                 | AAD53967.1     | 35 565.6 | 1     | 3.69%      | DPQTELLDPAVK    | 81.5 | 47.6 | 33.9  | 0 | 1 | 0 | 0 | 2          | 1 325.6955 |
|                                         | putative glycine-rich RNA-binding protein [Dianthus caryophyllus]  | BAF34340.1     | 16 872.1 | 1     | 5.68%      | SITVNEAQR       | 53.9 | 46.4 | 7.5   | 0 | 1 | 0 | 0 | 2          | 1 104.5649 |
|                                         | cyclophilin [Phaseolus vulgaris]                                   | CAA52414.1     | 18 141.5 | 1     | 11.60%     | VFFDMTIGGQPAGR  | 79.2 | 45.7 | 33.5  | 0 | 2 | 0 | 0 | 2          | 1 511.7319 |
|                                         | peroxidase [Spinacia oleracea]                                     | CAA71493.1     | 33 435.5 | 1     | 4.85%      | MGNISPLTGSSGEIR | 75.2 | 45.8 | 29.4  | 0 | 1 | 0 | 0 | 2          | 1 534.7536 |
|                                         | unnamed protein product [Populus trichocarpa]                      | ABK93386.1     | 83 612.9 | 1     | 0.92%      | HIDETLK         | 63   | 45.7 | 17.3  | 0 | 2 | 0 | 0 | 2          | 855.4578   |
| AWF <sub>NaCl</sub> _P4                 | Os09g0537600 [Oryza sativa (japonica cultivar-group)]              | NP_001063792.1 | 23 389.0 | 1     | 5.58%      | IVIGLYGDVVPK    | 53.5 | 46.3 | 7.2   | 0 | 1 | 0 | 0 | 2          | 1 272.7570 |
|                                         | oxidoreductase family protein [Arabidopsis thaliana]               | NP_188715.2    | 38 560.4 | 1     | 3.94%      | DVAVLEAMLESQAK  | 107  | 46.1 | 60.9  | 0 | 1 | 0 | 0 | 2          | 1 448.7308 |
|                                         | CYP1 (putative cyclophilin_ABH_like) [Vigna radiata]               | BAB82452.1     | 18 188.7 | 2     | 10.50%     | IVFELFADTTTPR   | 72.9 | 46   | 26.9  | 0 | 2 | 0 | 0 | 2          | 1 408.7479 |
|                                         | CYP1 (putative cyclophilin_ABH_like) [Vigna radiata]               | BAB82452.1     | 18 188.7 | 2     | 10.50%     | TAENFR          | 37.2 | 47.9 | -10.7 | 0 | 1 | 0 | 0 | 2          | 737.3582   |
|                                         | Cysteine proteinase inhibitor [Vigna unguiculata]                  | Q06445.1       | 10 740.0 | 1     | 16.50%     | DVAGNQSLEIDSLAR | 63.4 | 45.2 | 18.2  | 0 | 1 | 0 | 0 | 2          | 1 701.8408 |
|                                         | peroxidase2 [Medicago sativa]                                      | CAC38106.1     | 35 992.3 | 2     | 5.47%      | FDGLVSR         | 33.4 | 47.7 | -14.3 | 0 | 1 | 0 | 0 | 2          | 793.4209   |
|                                         | peroxidase2 [Medicago sativa]                                      | CAC38106.1     | 35 992.3 | 2     | 5.47%      | IAINMDPTTPR     | 65.2 | 46.5 | 18.7  | 0 | 1 | 0 | 0 | 2          | 1 244.6311 |
|                                         | putative glycine-rich RNA-binding protein [Dianthus caryophyllus]  | BAF34340.1     | 16 872.1 | 1     | 5.68%      | SITVNEAQR       | 56.6 | 46.4 | 10.2  | 0 | 1 | 0 | 0 | 2          | 1 104.5649 |
|                                         | cyclophilin [Phaseolus vulgaris]                                   | CAA52414.1     | 18 141.5 | 1     | 11.60%     | VFFDMTIGGQPAGR  | 89.8 | 45.7 | 44.1  | 0 | 2 | 0 | 0 | 2          | 1 511.7319 |
|                                         | peroxidase [Spinacia oleracea]                                     | CAA71493.1     | 33 435.5 | 2     | 7.12%      | MGASILR         | 49.8 | 47.7 | 2.1   | 0 | 2 | 0 | 0 | 2          | 763.4137   |
|                                         | peroxidase [Spinacia oleracea]                                     | CAA71493.1     | 33 435.5 | 2     | 7.12%      | MGNISPLTGSSGEIR | 56.4 | 45.8 | 10.6  | 0 | 1 | 0 | 0 | 2          | 1 534.7536 |
|                                         | pterocarpan reductase [Lotus japonicus]                            | BAF34844.1     | 33 974.1 | 1     | 3.23%      | AGHPTFALVR      | 59.6 | 46   | 13.6  | 0 | 0 | 1 | 0 | 2          | 1 068.5955 |
|                                         | unnamed protein product [Populus trichocarpa]                      | ABK94155.1     | 77 435.5 | 1     | 1.28%      | TCAQDEVLR       | 65.5 | 46.8 | 18.7  | 0 | 1 | 0 | 0 | 2          | 1 091.5157 |
|                                         | Os01g0840100 [Oryza sativa (japonica cultivar-group)]              | NP_001044757.1 | 71 715.0 | 1     | 1.99%      | TTPSYVAFDTSER   | 67.2 | 45.9 | 21.3  | 0 | 2 | 0 | 0 | 2          | 1 473.6861 |
| pterocarpan reductase [Lotus japonicus] | BAF34842.1                                                         | 36 176.4       | 1        | 3.09% | VIIIGDGNPK | 58.9            | 45.9 | 13   | 0     | 1 | 0 | 0 | 2 | 1 025.5998 |            |
| AWF <sub>NaCl</sub> _P5                 | unnamed protein product (putative Thaumatococcus) [Vitis vinifera] | CAO62993.1     | 26 139.4 | 1     | 4.07%      | GSDGSVIGCK      | 76.2 | 46.7 | 29.5  | 0 | 2 | 0 | 0 | 2          | 979.452    |
|                                         | CYP1 (putative cyclophilin_ABH_like) [Vigna radiata]               | BAB82452.1     | 18 188.7 | 1     | 6.98%      | IVFELFADTTTPR   | 76.6 | 46   | 30.6  | 0 | 2 | 0 | 0 | 2          | 1 408.7479 |
|                                         | peroxidase2 [Medicago sativa]                                      | CAC38106.1     | 35 992.3 | 1     | 3.34%      | IAINMDPTTPR     | 58.7 | 46.5 | 12.2  | 0 | 1 | 0 | 0 | 2          | 1 244.6311 |
|                                         | putative glycine-rich RNA-binding protein [Dianthus caryophyllus]  | BAF34340.1     | 16 872.1 | 1     | 5.68%      | SITVNEAQR       | 60.8 | 46.4 | 14.4  | 0 | 1 | 0 | 0 | 2          | 1 104.5649 |
|                                         | Protein P21 (putative Thaumatococcus) [Glycine max]                | P25096.1       | 25 930.1 | 1     | 4.18%      | TGCNFDGSGR      | 86   | 46   | 40    | 0 | 1 | 0 | 0 | 2          | 1 070.4326 |
|                                         | cyclophilin [Phaseolus vulgaris]                                   | CAA52414.1     | 18 141.5 | 1     | 8.14%      | VFFDMTIGGQPAGR  | 90.1 | 45.7 | 44.4  | 0 | 2 | 0 | 0 | 2          | 1 511.7319 |
|                                         | peroxidase [Spinacia oleracea]                                     | CAA71493.1     | 33 435.5 | 1     | 4.85%      | MGNISPLTGSSGEIR | 87.1 | 45.8 | 41.3  | 0 | 1 | 0 | 0 | 2          | 1 534.7536 |
|                                         | Os01g0840100 [Oryza sativa (japonica cultivar-group)]              | NP_001044757.1 | 71 715.0 | 1     | 1.99%      | TTPSYVAFDTSER   | 67.5 | 45.9 | 21.6  | 0 | 1 | 0 | 0 | 2          | 1 473.6861 |
| AWF <sub>NaCl</sub> _P6                 | CYP1 (putative cyclophilin_ABH_like) [Vigna radiata]               | BAB82452.1     | 18 188.7 | 1     | 6.98%      | IVFELFADTTTPR   | 76.5 | 46   | 30.5  | 0 | 1 | 0 | 0 | 2          | 1 408.7479 |
|                                         | putative glycine-rich RNA-binding protein [Dianthus caryophyllus]  | BAF34340.1     | 16 872.1 | 1     | 5.68%      | SITVNEAQR       | 73.2 | 46.4 | 26.8  | 0 | 1 | 0 | 0 | 2          | 1 104.5649 |
|                                         | cyclophilin [Phaseolus vulgaris]                                   | CAA52414.1     | 18 141.5 | 1     | 8.14%      | VFFDMTIGGQPAGR  | 56.4 | 45.7 | 10.7  | 0 | 1 | 0 | 0 | 2          | 1 511.7319 |
|                                         | peroxidase [Spinacia oleracea]                                     | CAA71493.1     | 33 435.5 | 1     | 4.85%      | MGNISPLTGSSGEIR | 88.6 | 45.8 | 42.8  | 0 | 2 | 0 | 0 | 2          | 1 534.7536 |

<sup>a</sup> AWF<sub>H2O</sub> and AWF<sub>NaCl</sub> describe the apoplast extraction solution from which the BN-PAGE followed by protein sequencing was performed, respectively.

Numbers P1 to P6 correspond to the numbers given in Fig. 3.

<sup>b</sup> Identities are based on sequence comparisons using the NCBI green plants protein database

<sup>c</sup> Accession numbers are based on sequence comparisons using the NCBI green plants protein database

<sup>d</sup> Molecular weights (MW) are based on sequence comparisons using the NCBI green plants protein database

<sup>e</sup> Protein sequence coverage obtained with the peptides identified by mass spectrometry
